# Supplementary material for: Isolation and genome-wide characterization of cellular DNA:RNA triplex structures
Source: PubMed Central journal article supplement — Nucleic Acids Res. 2019 Jan 3;47(5):2306–21. doi: 10.1093/nar/gky1305 (PMC6411930; doi:10.1093/nar/gky1305), 2019-01-03
Supplement: gky1305_supplemental_files.pdf [file gky1305_supplemental_files.pdf]

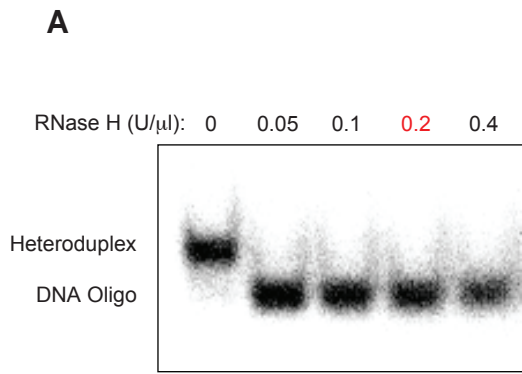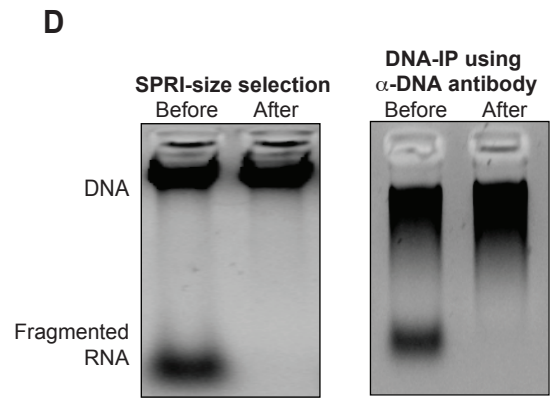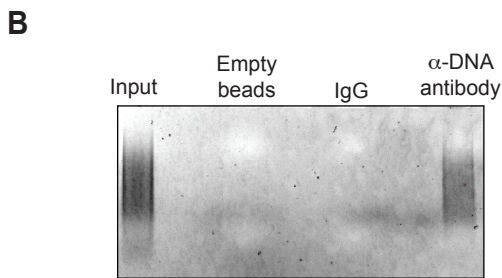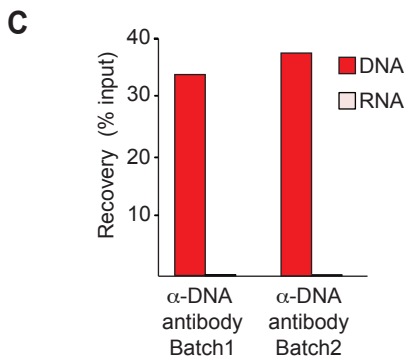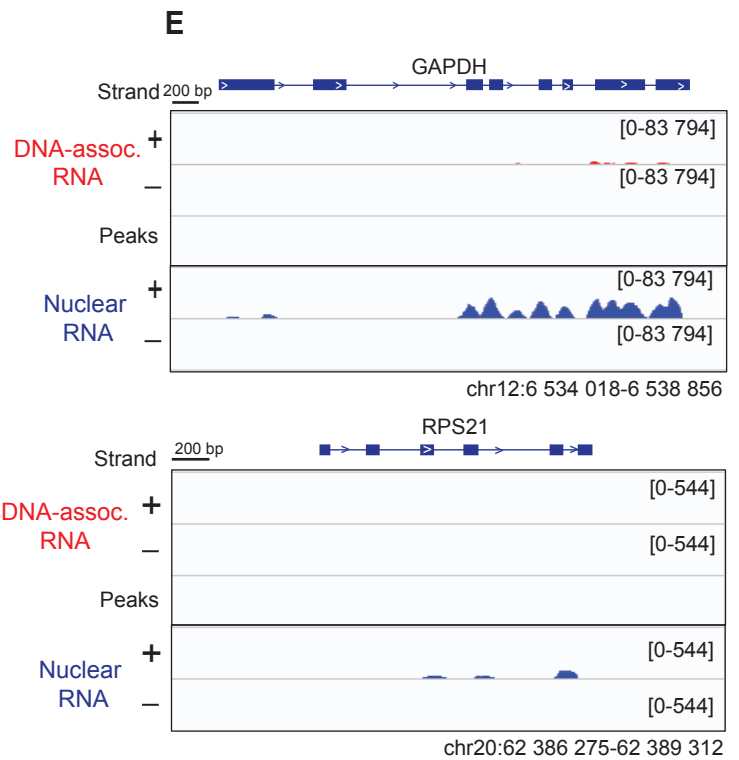

**Figure S1.**

**(A)** Polyacrylamide gel electrophoresis showing digestion of heteroduplexes in the fractionation protocol. Synthetic heteroduplexes formed with a radiolabeled DNA and an unlabeled RNA oligo were spiked into chromatin-associated nucleic acids and digested with different concentrations of RNase H. 0.2 U/ $\mu$ l of RNase H were used for all further experiments.

**(B)** Gel electrophoresis validating the recovery of DNA after purification with anti-DNA antibody (DNA-IP) but not with empty beads or IgGs.

**(C)** Comparison of DNA and RNA recovery by anti-DNA antibody immunopurification. Radiolabeled RNA was spiked into chromatin-associated nucleic acids before DNA was immunopurified with anti-DNA antibody. DNA and spiked-in RNA were quantified by QUBIT fluorometry and scintillation counting, respectively.

**(D)** Agarose gel electrophoresis showing separation of RNase I-fragmented RNA (average below 150 nt) from long DNA by SPRI-size selection (left) and DNA-IP (right).

**(E)** RNA-seq profiles for RPS21 and GAPDH in DNA-associated RNA (DNA-IP) and nuclear RNA from U2OS cells. Minus (-) and plus (+) strands are shown.

**A**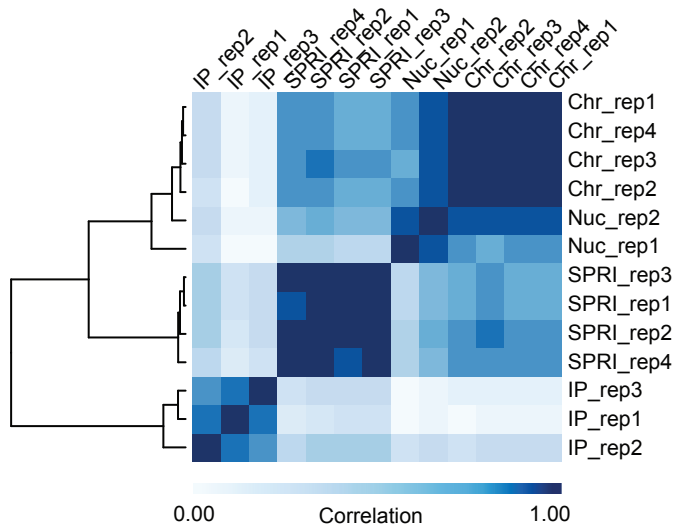**C**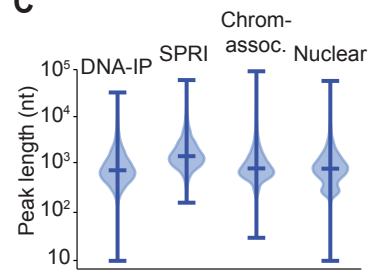**B**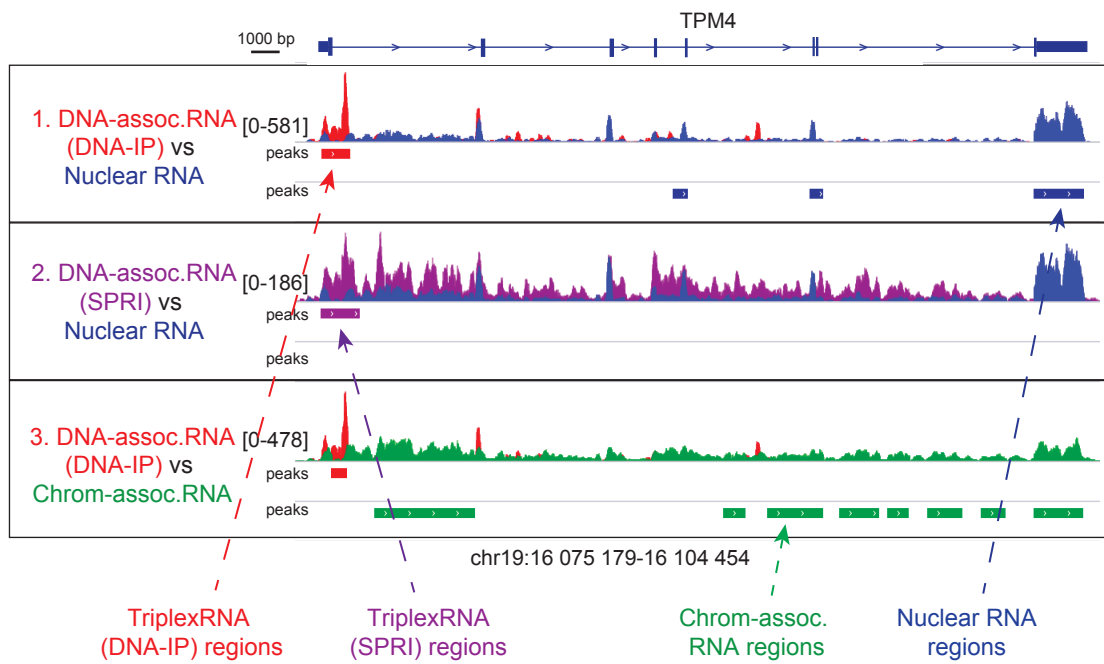**D**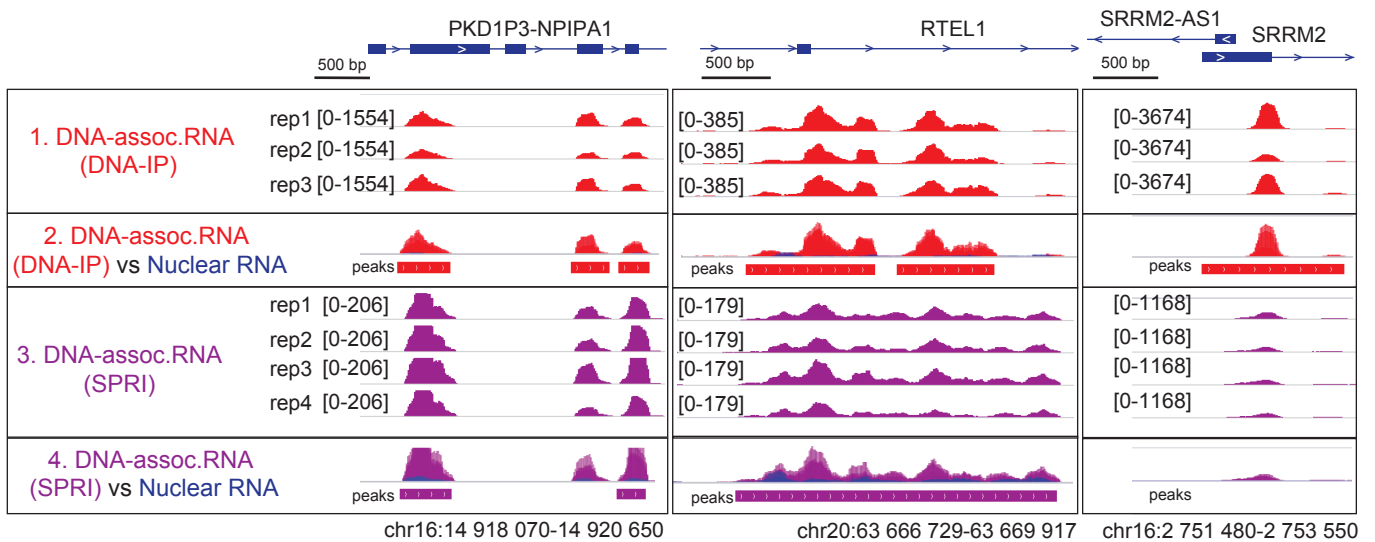

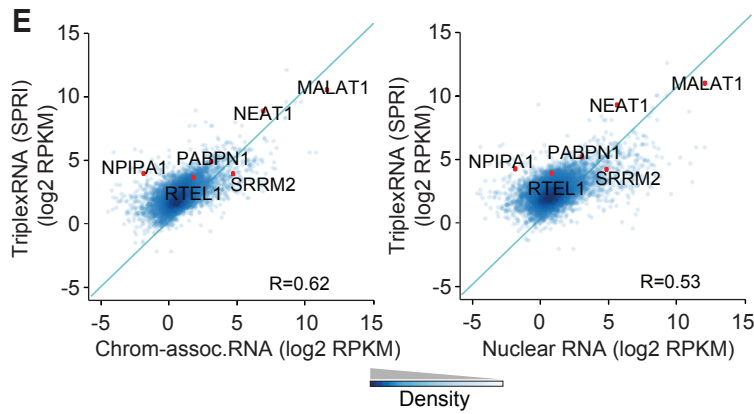

**F**

|                     | Total Peaks | Peaks overlapping DRIPc-seq |
|---------------------|-------------|-----------------------------|
| TriplexRNA (DNA-IP) | 7189        | 1524                        |
| TriplexRNA (SPRI)   | 3282        | 745                         |

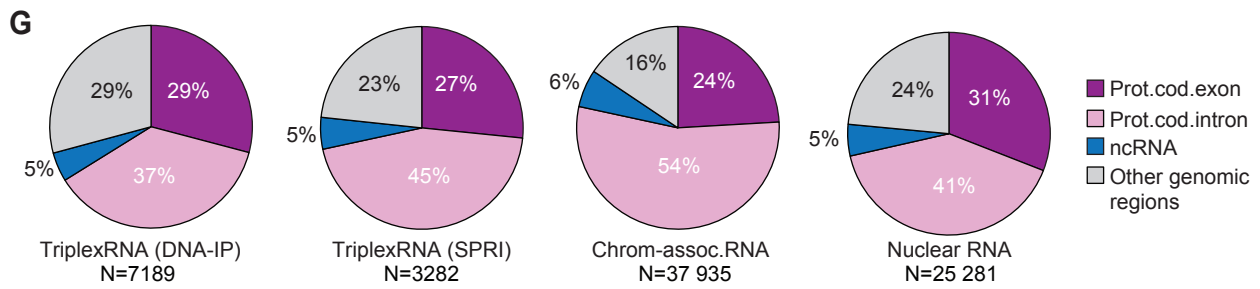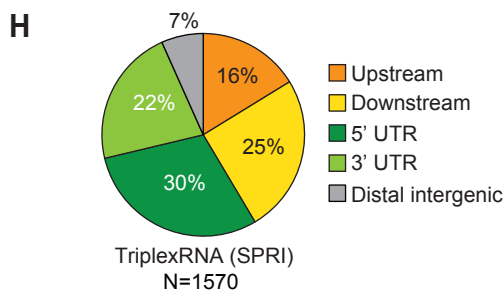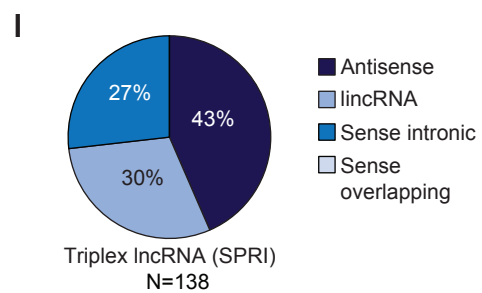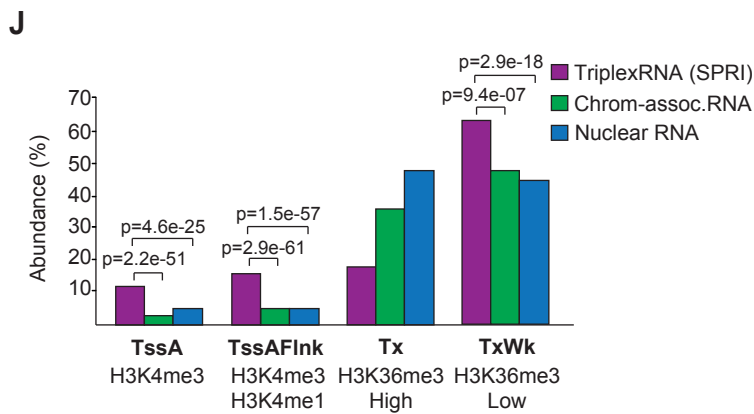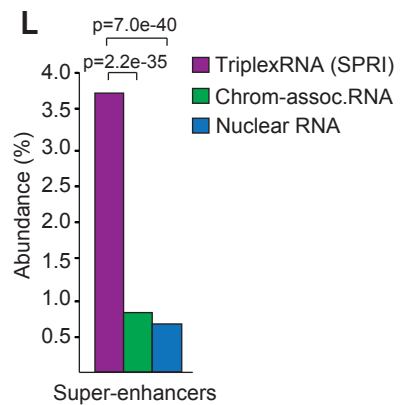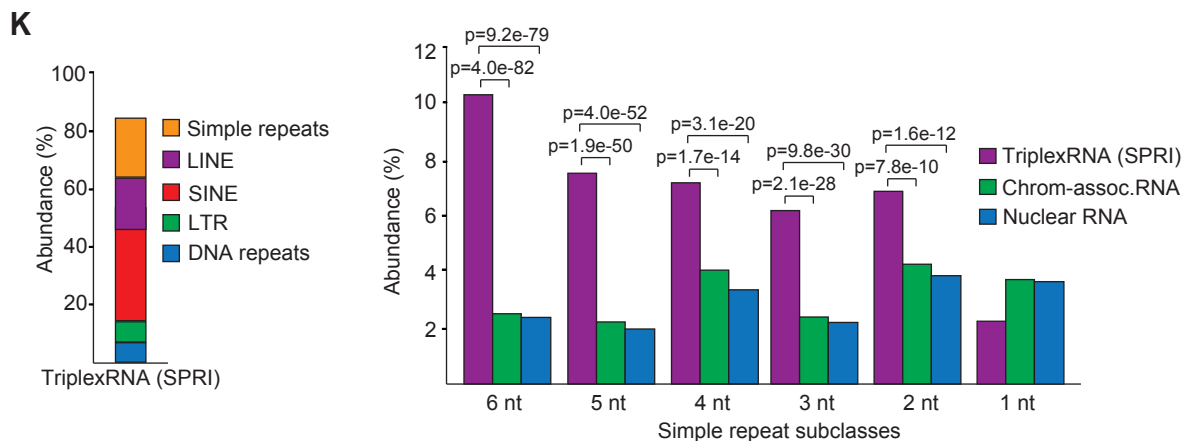

## Figure S2.

(A) Heatmap demonstrating the correlation of the signals among biological replicates of TriplexRNA-seq libraries from HeLa S3 cells. Pearson's correlation coefficient R is shown.

(B) Computational pipeline to detect enriched RNA regions in DNA-associated, chromatin-associated and nuclear RNA exemplified at the *TPM4* locus. Differential peak calling considering replicates was performed for pairs of RNA fractions. Differential peak regions are indicated below the signal tracks. Nuclear RNA regions are blue (track 1, 2), chromatin associated regions green (track 3), DNA-associated RNA regions from DNA-IP are red (track 1) and from SPRI-size selection are purple (track 2). For simplicity, only positive strands are shown.

(C) Violin plot showing the length of regions enriched in TriplexRNA (DNA-IP & SPRI-size selection), chromatin-associated and nuclear RNA. y-axis is in log<sub>10</sub> scale. Whiskers represent 100%, 50% and 0% quantiles of the distribution.

(D) Screenshot of representative TriplexRNA-seq regions, comparing signals from DNA-IP and SPRI-size selection. Signals in biological replicates are shown in Track 1 and 3. Differential peaks identified from the comparison of DNA-associated RNA and nuclear RNA are demonstrated in Track 2 and 4. For simplicity, only positive strands are shown.

(E) Scatter plots showing the correlation of TriplexRNA (SPRI) with chromatin-associated RNA and nuclear RNA across 7148 genes overlapping peaks. Pearson correlation coefficient (R) is shown. Green diagonal line  $x=y$ . Some representative genes that overlap TriplexRNAs and control RNAs are highlighted.

(F) Abundance of TriplexRNA peaks in HeLa S3 cells overlapping R-loop regions identified by DRIPc-seq in Ntera2 cells (40).

(G) Pie charts depicting genomic distribution of peaks from TriplexRNA, chromatin-associated and nuclear RNA.

(H) Pie chart depicting the genomic distribution of TriplexRNA (SPRI), excluding intronic and exonic gene regions. Upstream and downstream regions are defined within 2.5 kb proximity of the closest gene.

(I) Pie chart showing the classification of lncRNAs that overlap peaks in TriplexRNA (SRPI).

(J) Association of TriplexRNA (SPRI) and control RNAs with ChromHMM promoter states and transcribed states. Active transcription start site (TssA), flanking active TSS (TssAFlnk), strong (Tx) and weak (TxWk) transcription regions are shown.

(K) Left: TriplexRNA (SPRI) overlapping different classes of repeat elements. Right: Abundance of simple repeat subclasses.

**(L)** Abundance of TriplexRNA peaks (SPRI) overlapping super-enhancers in HeLa S3 cells.

Adjusted p-values  $<0.05$  in panels (J-L) were obtained from one-tailed Fisher's exact test using chromatin-associated and nuclear RNA as control.

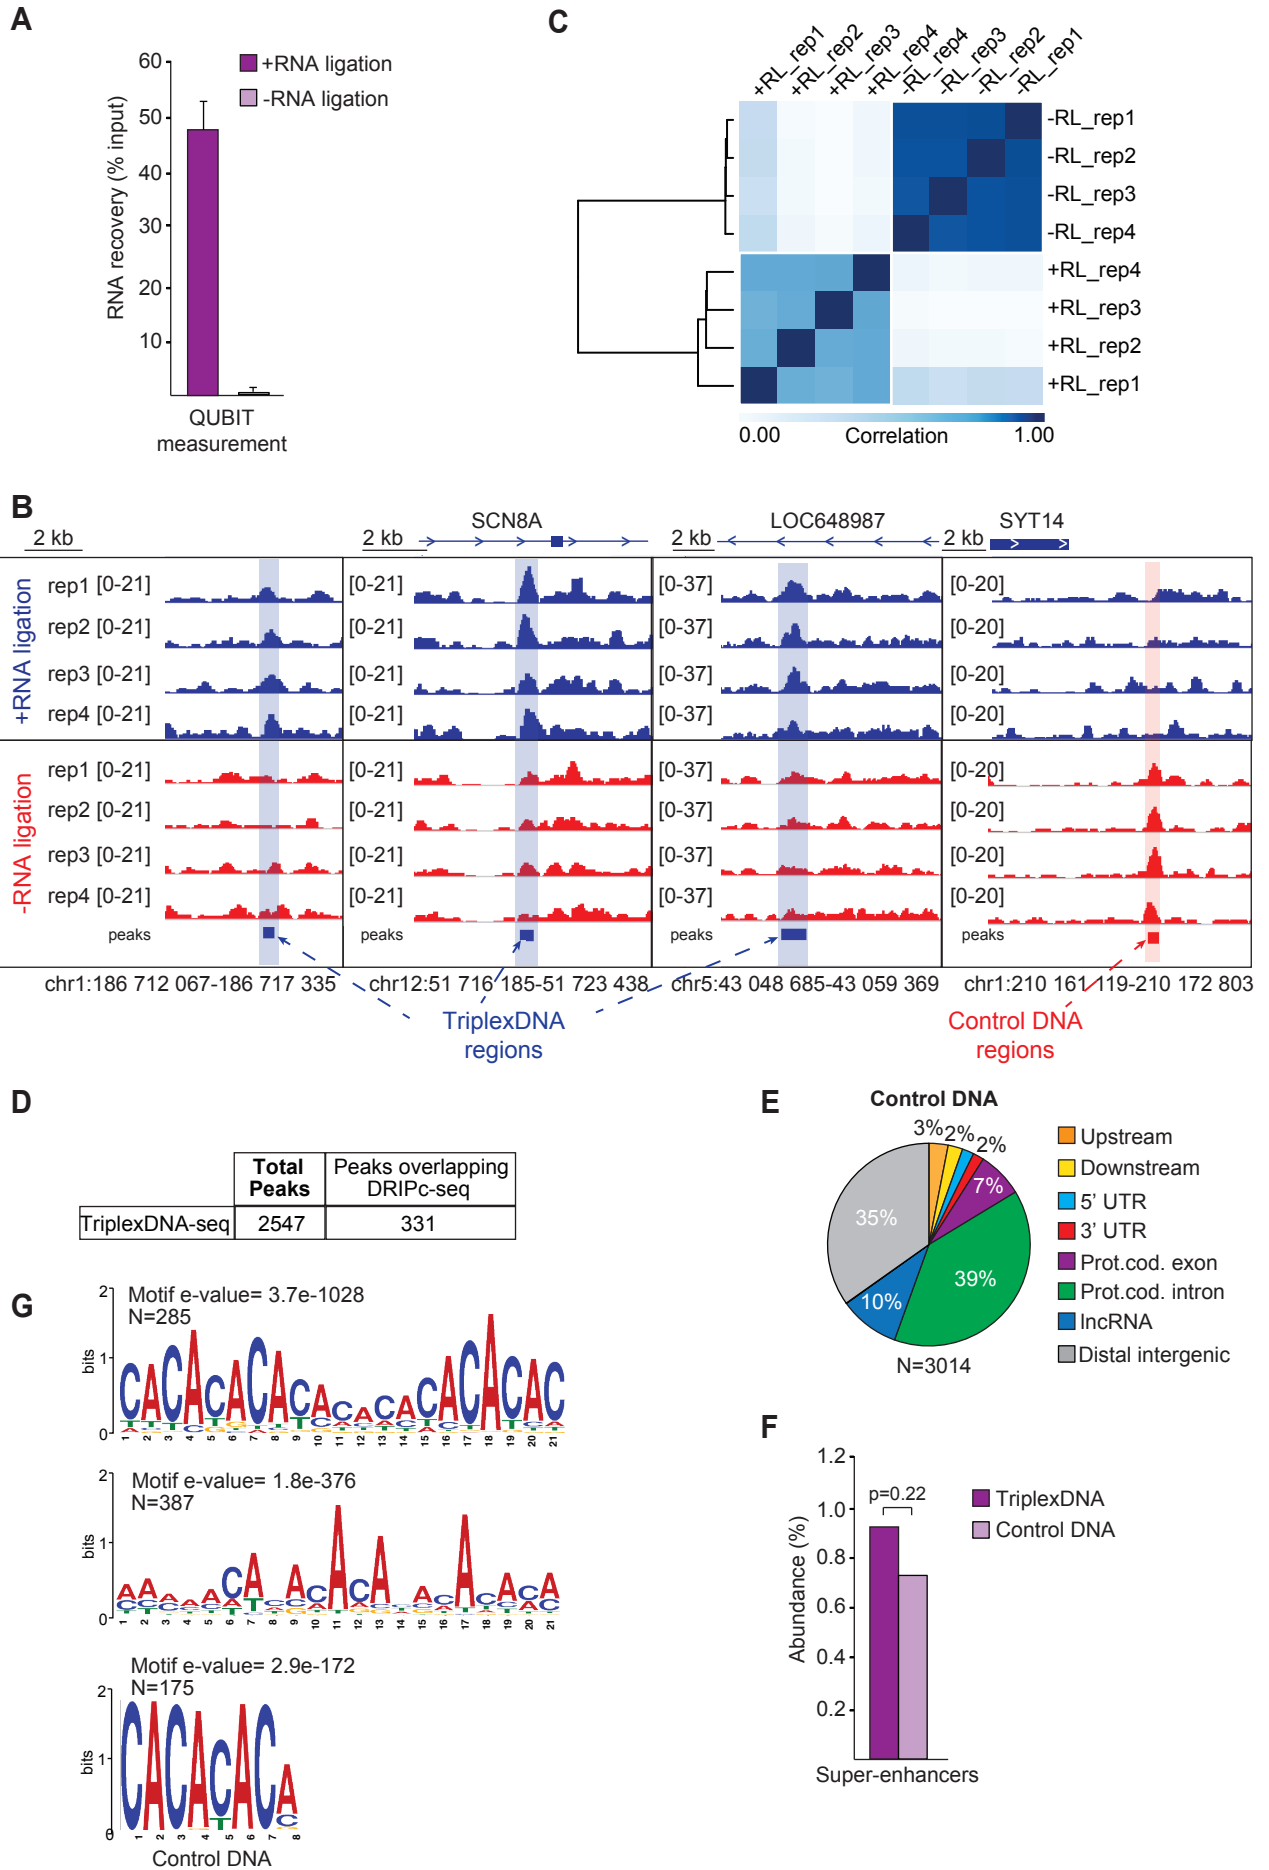

**Figure S3.**

**(A)** QUBIT fluorometric quantification of RNAs recovered from ligation-mediated pull-down of chromatin-associated RNAs as compared to control samples without ligation. Values are presented relative to input RNA ( $\pm$ SD, N=4).

**(B)** Screenshots of representative TriplexDNA-seq regions, displaying signals in biological replicates. Enriched regions identified by differential peak calling are shaded.

**(C)** Heatmap depicting the correlation of the signals among biological replicates of TriplexDNA-seq libraries from HeLa S3 cells. Spearman's correlation coefficient ( $r_s$ ) is shown.

**(D)** Abundance of TriplexDNA peaks in HeLa S3 cells overlapping R-loop regions identified by DRIPc-seq in Ntera2 cells (40).

**(E)** Pie charts depicting the genomic distribution of control DNA regions. Upstream and downstream regions are defined within 2.5 kb proximity of the closest gene.

**(F)** Abundance of TriplexDNA-seq peaks overlapping super-enhancers in HeLa S3 cells. Adjusted p-value was obtained from one-tailed Fisher's exact test.

**(G)** MEME motif analysis identifying consensus motifs in randomly selected 500 control DNA peaks.



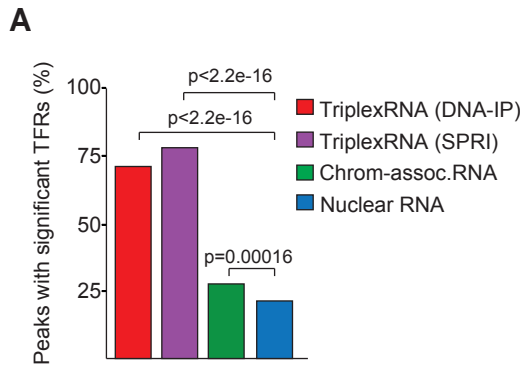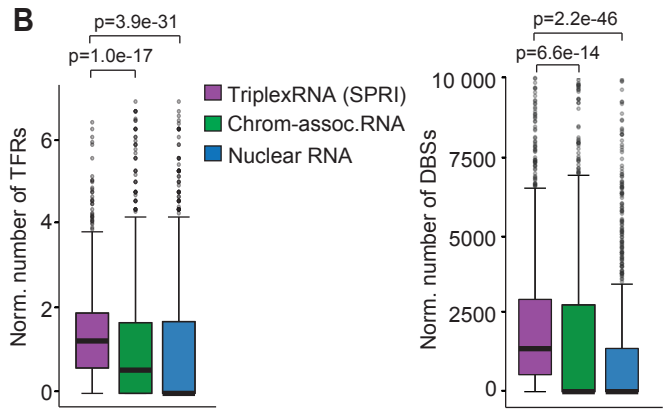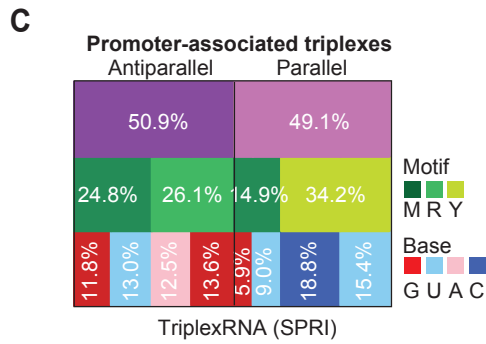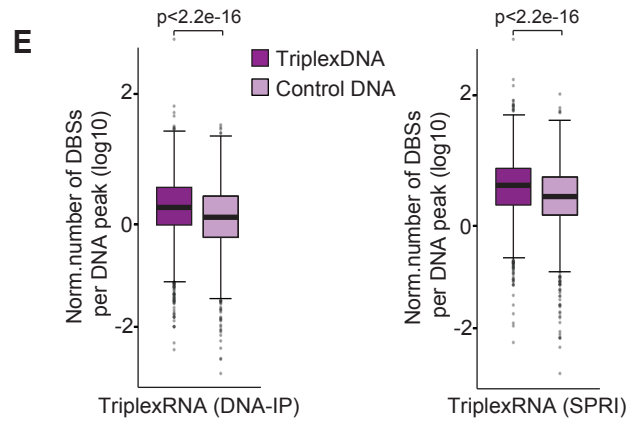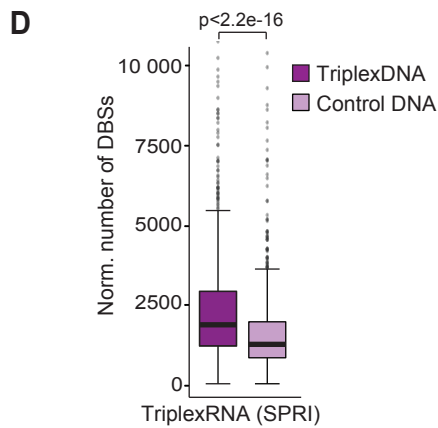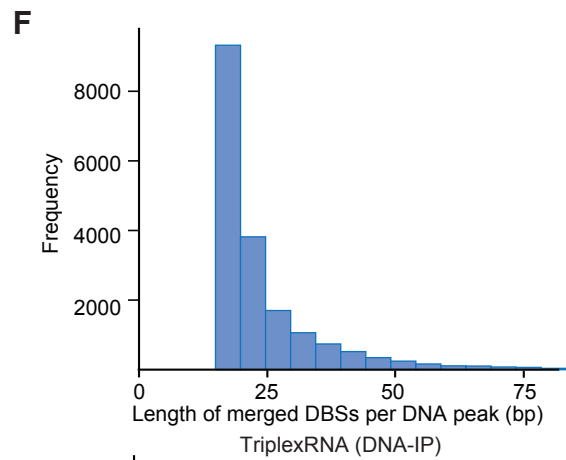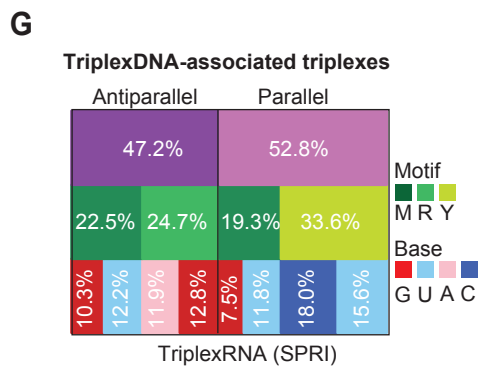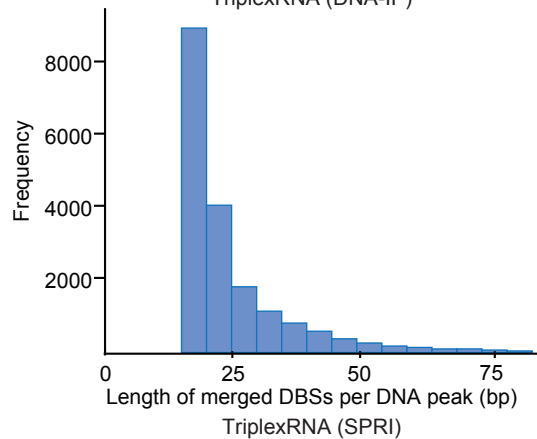

**H**

**Triplex interactions between  
TriplexRNA and TriplexDNA**

|        | Trans     | Cis     | Local |
|--------|-----------|---------|-------|
| DNA-IP | 3 662 965 | 162 345 | 45    |
| SPRI   | 6 760 593 | 357 172 | 98    |

**I**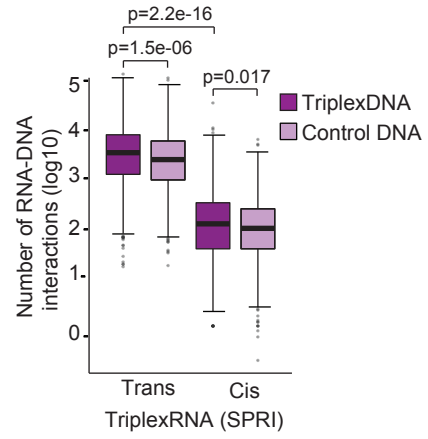**J**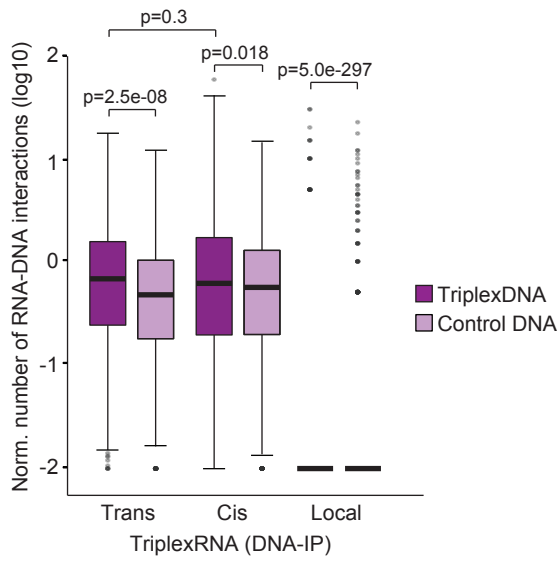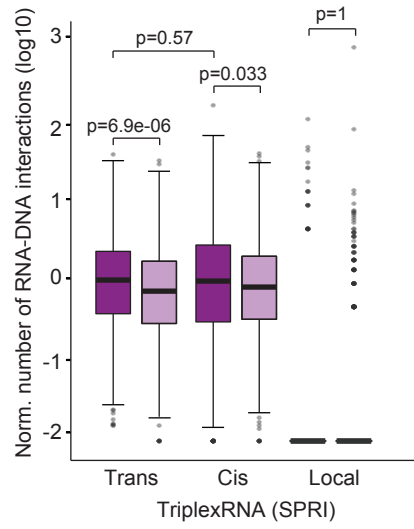**K**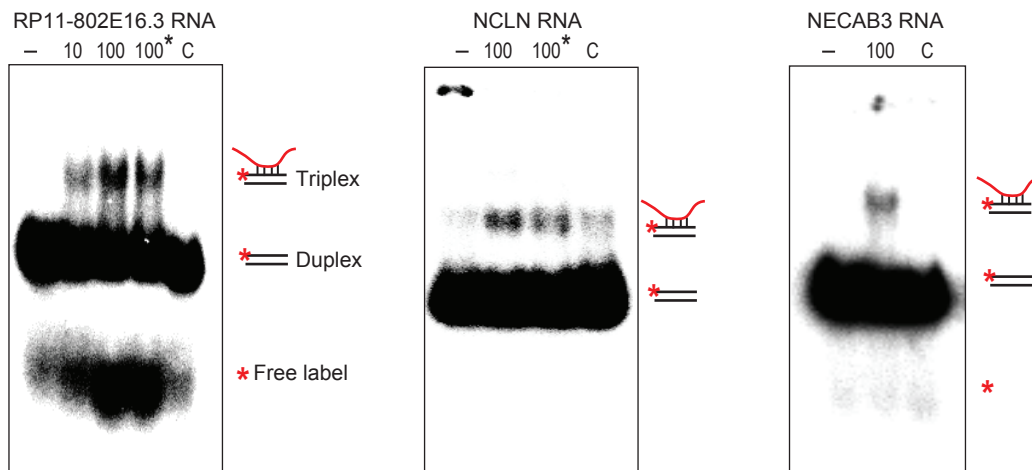

#### Figure S4.

(A) TDF analysis showing the number of peaks in TriplexRNA, chromatin-associated RNA and nuclear RNA that have potential to form triplex with active promoters defined by ChromHMM. Adjusted p-values were obtained from one-tailed Fisher's exact test.

(B) TDF analysis predicting the potential of top 1000 enriched TriplexRNA (SPRI) regions (ranked by peak p-value) to bind to active promoters. Left: Number of TFRs in RNA (per kilobase of RNA). Right: Number of putative DBSs at promoters (per kilobase of RNA).

(C) Motif analysis of triplexes formed between TriplexRNA (SPRI) and active promoters. The diagram depicts the fraction of antiparallel and parallel triplexes with the respective motif and nucleotide composition of TFRs in TriplexRNA.

(D) TDF analysis comparing the triplex-forming potential of top 2000 TriplexDNA-seq regions with top 1000 TriplexRNA (SPRI) (ranked by peak p-value). The number of putative DBSs (per kilobase of RNA) is shown.

(E) Box plot showing the number of DBSs per TriplexDNA peak normalized by the peak length.

(F) Frequency and length of DBSs in TriplexDNA peaks. Merged length is shown for peaks with overlapping DBSs.

(G) Motif analysis of predicted triplexes formed between TriplexRNA (SPRI) and TriplexDNA. The diagram depicts the fraction of antiparallel and parallel triplexes and the respective motif and nucleotide composition of TFRs in TriplexRNA.

(H) Table showing the numbers of predicted triplexes between TriplexRNA and TriplexDNA regions, classified as local (within 10 kb distance), *cis* (>10 kb in the same chromosome) and *trans* (at different chromosomes).

(I) Box plot classifying triplex interactions between TriplexRNAs (SPRI) and TriplexDNA-seq regions as *cis* (>10 kb in the same chromosome) and *trans* (at different chromosomes) interactions, excluding underrepresented local interactions (within 10 kb distance).

(J) Boxplot showing the number of local, *cis* and *trans* triplex interactions between TriplexRNA and TriplexDNA regions normalized by the expected genomic region size.

(K) Full gel images of the EMSAs shown in **Figure 4F**. Positions of triplex, duplex and free radiolabel are indicated.

Adjusted p-values <0.05 in panels (B,D,E,I,J) are based on one-tailed Mann-Whitney test.

**A**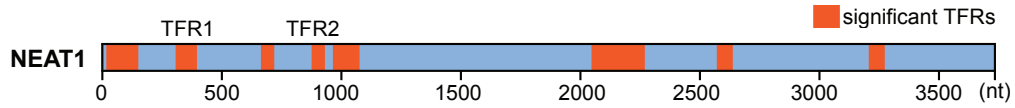**B**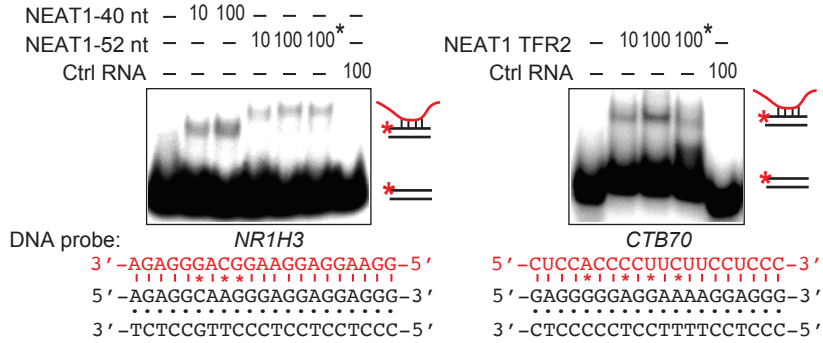**D**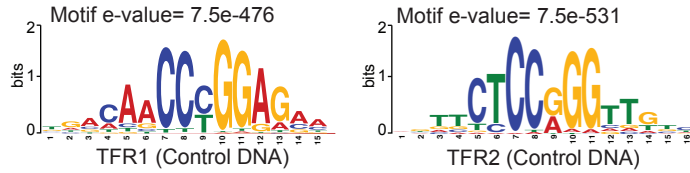**E**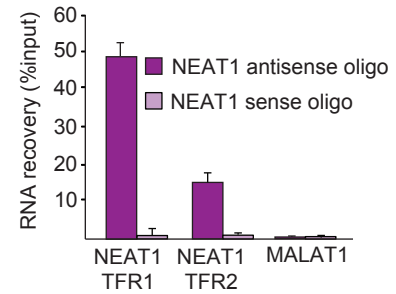**C**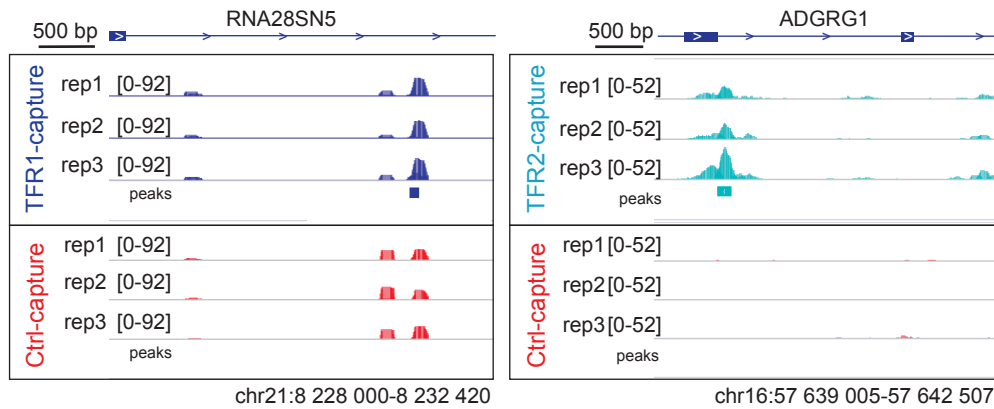**F**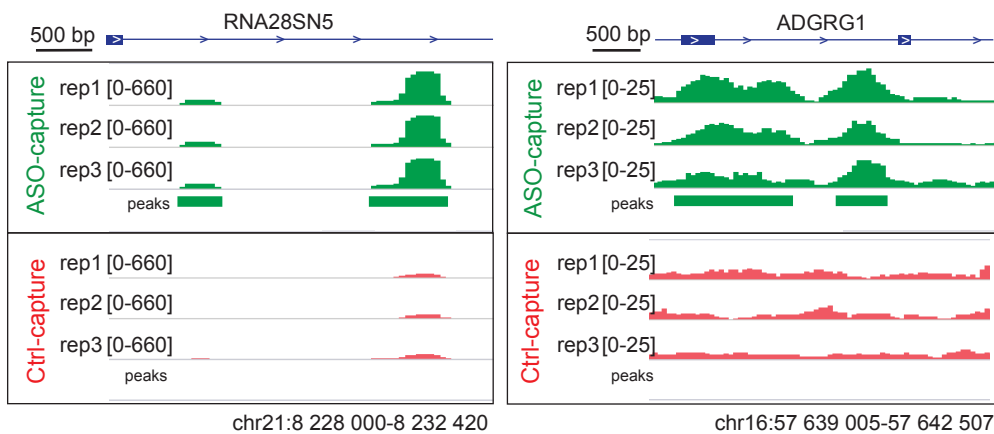

**G**

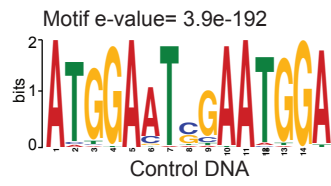

**H**

|                 | Total Peaks | Peaks overlapping ASO-capture-seq | Peaks overlapping CHART-seq |
|-----------------|-------------|-----------------------------------|-----------------------------|
| ASO-capture-seq | 3780        | 3780                              | 476                         |
| CHART-seq       | 1244        | 233                               | 1244                        |

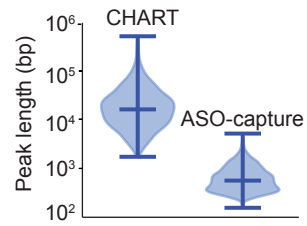

**I**

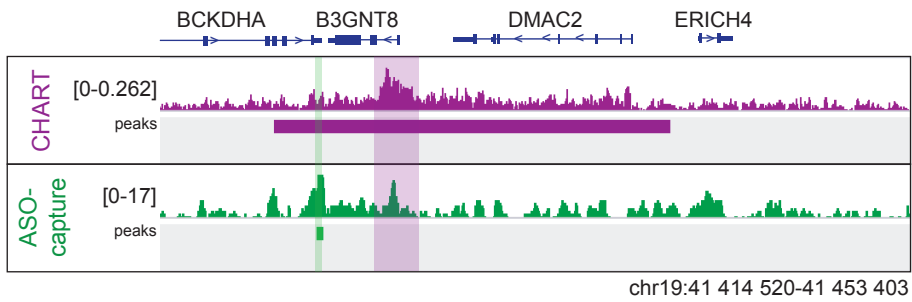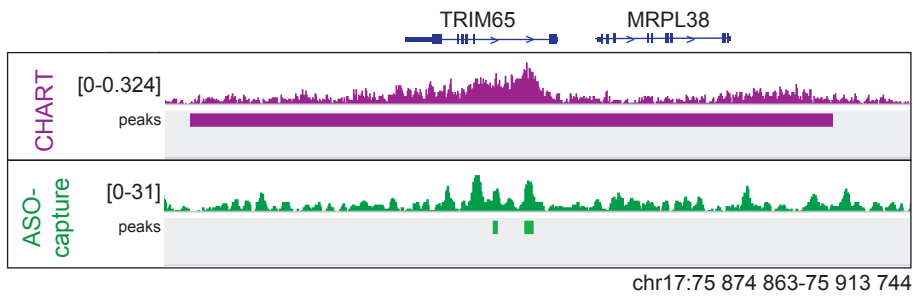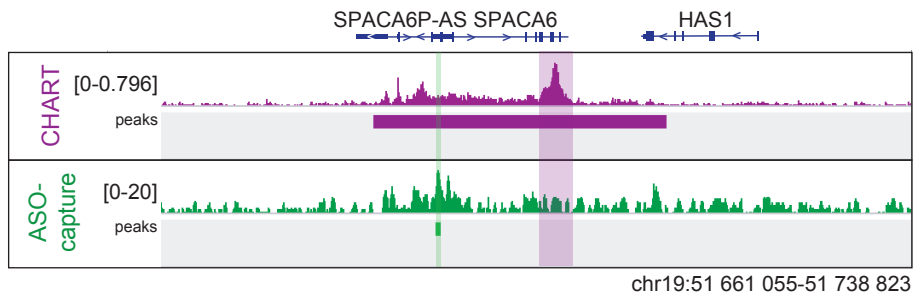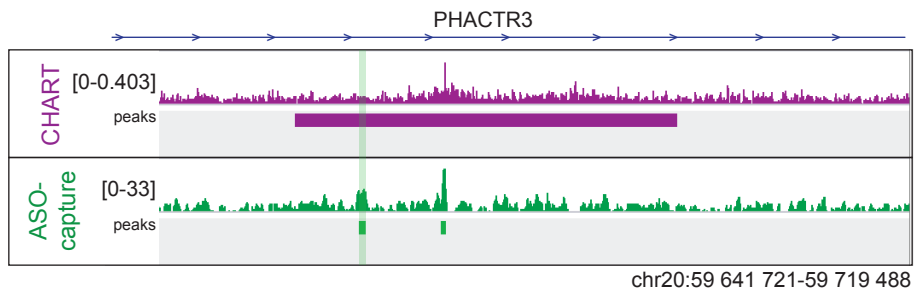

## Figure S5.

**(A)** TDF-mediated prediction of TFRs in NEAT1 which bind to DNA regions that have been identified by CHART-seq (7). TFR1 and TFR2 positions are indicated.

**(B)** EMSAs using 10 or 100 pmol of synthetic NEAT1 versions comprising TFR1 (40 or 52 nt) or TFR2 incubated with 0.25 pmol of double-stranded <sup>32</sup>P-labeled oligonucleotides (**Supplementary Table S2**). NEAT1 targets were from CHART-seq data (7). Reactions marked with an asterisk (\*) were treated with 0.5 U RNase H. RNA without a putative TFR was used as a control. Potential Hoogsteen base pairing between motifs and respective TFR sequences are shown; mismatches are marked (\*).

**(C)** Screenshots of representative regions enriched by NEAT1-TFR capture. Signals from biological replicates are displayed.

**(D)** MEME motif analysis identifying consensus motifs in control DNA regions from TFR1-based (in 376 of top 500 peaks) and TFR2-based (in 364 of top 500 peaks) capture experiments. Ranking is based on peak p-values.

**(E)** RT-qPCR analysis of RNA recovered by ASO-based capture of NEAT1. As control, a biotinylated sense oligo with the same sequence as NEAT1 was used. Data are presented relative to input ( $\pm$ SD, N=4).

**(F)** Screenshots of representative regions enriched by NEAT1-ASO capture, displaying signals in biological replicates.

**(G)** MEME motif analysis identifying a consensus motif in 61 of top 500 peaks control DNA regions identified by ASO-based NEAT1 capture experiments. Ranking is based on peak p-values.

**(H)** Top: Overlap between data from CHART-seq (7) and ASO-capture-seq in MCF7 cells. Bottom: Violin plots showing the peak lengths in both approaches. y-axis is in log<sub>10</sub> scale. Whiskers represent 100%, 50% and 0% quantiles of the distribution.

**(I)** Screenshots of representative regions that are co-enriched by ASO-capture-seq and CHART-seq. Identified peaks in both approaches are indicated below the signal tracks. The regions shaded green show ASO-capture signals underrepresented in CHART-seq. The purple shaded regions demonstrate the CHART-seq signals which are not detected as peak in ASO-capture-seq, presumably protein-mediated interactions. For simplicity, control libraries are not included.

Data are from HeLa S3 cells unless otherwise stated.

**Supplementary Table S1.**

Sequences of oligos used in RT-qPCR analyses

| Name            | Sequence (5'-3')         |
|-----------------|--------------------------|
| 18S, for        | GCGACCTCAGA TCAGACGTGG   |
| 18S, rev        | CTGTTCACTCGCCGTTACTGAG   |
| GAPDH, for      | GAGTCAACGGATTTGGTCGT     |
| GAPDH, rev      | TTGATTTTGGAGGGATCTCG     |
| pre-GAPDH, for  | GAGCTGGGGAATGGGACT       |
| pre-GAPDH, rev  | TGATGGCATGGACTGTGG       |
| KHPS1, for      | CAGGATCCGACCTTTCTGG      |
| KHPS1, rev      | ACTCAAGGCTGGTGGTAGTGG    |
| MALAT1, for     | AAATGTGAAGGACTTTCGTAACG  |
| MALAT1, rev     | CACCTGGGTCAGCTGTCAAT     |
| NEAT1 TFR1, for | TTGCATAGCTGAGCGAGCC      |
| NEAT1 TFR1, rev | TGCCTGCCTTCCTGATCATTT    |
| NEAT1 TFR2, for | GGCGCTAAACTCTTCTTGAG     |
| NEAT1 TFR2, rev | CTTACTGTCCCGGGCTTACCA    |
| RPS21, for      | TTTCATTCTTACCGCCCAAGTCCC |
| RPS21, rev      | AGCCTCTGCCTGTACCTCACCC   |

**Supplementary Table S2.**

Sequences of RNAs and DNA oligos used in EMSAs

| Name                    | Sequence (5'-3')                                                  |
|-------------------------|-------------------------------------------------------------------|
| RP11-802E16.3 RNA       | UGTGCUGGGGAAGAAGAGGAGGAGGUGGAGGAGGGCUGAUG<br>AUGGGGCCACAUGCUGCGGG |
| NCLN RNA                | GUGGUGGGGAAGAUGGGAGUUGCCGCUGUGGAGAGUGAGG<br>AGAAA                 |
| NECAB3 RNA              | GGAGACAGGGAGAAGAGGAUGGAGACAGGGAGGCUGGGGG<br>GCAGGUUGGCGG          |
| NEAT1 TFR1<br>RNA 40 nt | UGUGGAAGGAGGAAGGCAGGGAGAGGUAGAAGGGGUGGAG                          |
| NEAT1 TFR1<br>RNA 52 nt | UGUGGAAGGAGGAAGGCAGGGAGAGGUAGAAGGGGUGGAG<br>GAGUCAGGAGGA          |
| NEAT1 TFR2<br>RNA 55 nt | GAGCUCACUCCACCCCUUCUCCUCCCUUAACUUAUCCAUU<br>CACUUA AAA CAUU       |
| Negative control RNA    | GUCGGUCUUAUCAGUUCUCCGGGUUGUCAG                                    |
| RAB6A, for              | GGAGGGGAAGGAAAGAAAGGGGAGGGGGAGAAGGGTGGGG                          |
| RAB6A, rev              | CCCCACCCTTCTCCCCCTCCCCTTCTTTCCCTCCCCCTCC                          |
| NCLN, for               | CTGTCCCCACCTTTCGCCCTCACCTAGC                                      |
| NCLN, rev               | GCTAGGGTGAGGGGCGAAAGGTGGGGACAG                                    |
| KLHL21, for             | TGGGAGGCTGAGGCAGGAGAATCGCTTGAAC                                   |
| KLHL21, rev             | GTTCAAGCGATTCTCCTGCCTCAGCCTCCCA                                   |
| FLI1, for               | GGGAGAGAGAGAGAGGGAAGGAAGGGAAGG                                    |
| FLI1, rev               | CCTTCCCTTCCCTCCTCTCTCTCTCC                                        |
| GRIK4, for              | GGGAGGAGGAAGAGGGAGAGGGAGGAGGAA                                    |

|              |                                |
|--------------|--------------------------------|
| GRIK4, rev   | TTCCTCCTCCCTCTCCCTCTTCCTCCTCCC |
| NR1H3, for   | TCCAGAGGCAAGGGAGGAGGAGGGAGGCT  |
| NR1H3, rev   | AGCCTCCCTCCTCCTCCCTTGCTCTGGGA  |
| CTB70, for   | GAAGGAGAGGGGGAGGAAAAGGAGGGTGA  |
| CTB70, rev   | TCCACCCTCCTTTTCTCCCTCCTCCTTC   |
| CYP4F22, for | AGAAGGAGGAGGAGAAGAGGGAGGAAGAAG |
| CYP4F22, rev | CTTCTTCTCCCTCTTCTCCTCCTCCTTCT  |

### Supplementary Table S3.

Sequences of oligos used in RNA-associated DNA experiments

| Name                  | Sequence (5'-3')                                                  | Application                           |
|-----------------------|-------------------------------------------------------------------|---------------------------------------|
| NEAT1 TFR1 RNA oligo  | Pso6C/AAGGAGGAAGGCAGGGAGAGGUAG AAGGGGUGGAGGAGUCAGGAGGA/ TEGbiotin | Capture of NEAT1-assoc. DNA           |
| NEAT1 TFR2 RNA oligo  | Pso6C/UCACUCCACCCCUUCUCCUCCUU UAACUUAUCCA/TEGbiotin               | Capture of NEAT1-assoc. DNA           |
| RNA control oligo     | Pso6C/GUCGGUCUUAUCAGUUCUCGGGU UGUCAG/TEGbiotin                    | Capture of NEAT1-assoc. DNA           |
| NEAT1 antisense oligo | TGTCTGTCCCCTGAAGCCCTG/TEGbiotin                                   | ASO-based capture of NEAT1-assoc. DNA |
| NEAT1 sense oligo     | GCTGGGGGTGCGAGAAGGAA/TEGbiotin                                    | ASO-based capture of NEAT1-assoc. DNA |
| Ligation linker oligo | 5Phos/GTTGGAGTTCGGTGTGTGGG/ TEGbiotin                             | Isolation of RNA-assoc. DNA           |

### Supplementary Table S4.

Read/ peak numbers in TriplexRNA-seq

| Samples             | Library average size (bp) | Uniquely mapped reads  | Total reads | % of uniquely mapped reads |
|---------------------|---------------------------|------------------------|-------------|----------------------------|
| Nuclear_rep1        | 330                       | 39 081 484             | 49 027 136  | 79.71                      |
| Nuclear_rep2        | 346                       | 29 714 487             | 36 158 302  | 82.18                      |
| Chromatin_rep1      | 383                       | 38 461 945             | 46 939 070  | 81.94                      |
| Chromatin_rep2      | 364                       | 39 710 878             | 47 898 697  | 82.91                      |
| Chromatin_rep3      | 387                       | 33 644 670             | 39 119 495  | 86.00                      |
| Chromatin_rep4      | 384                       | 37 304 975             | 43 641 809  | 85.48                      |
| SPRI_rep1           | 429                       | 35 871 152             | 43 745 808  | 82.00                      |
| SPRI2_rep2          | 413                       | 37 093 026             | 44 458 085  | 83.43                      |
| SPRI_rep3           | 433                       | 35 327 259             | 42 523 924  | 83.08                      |
| SPRI_rep4           | 421                       | 35 286 452             | 43 094 668  | 81.88                      |
| IP_rep1             | 336                       | 28 510 682             | 60 801 254  | 46.89                      |
| IP_rep2             | 368                       | 23 752 023             | 45 413 818  | 52.30                      |
| IP_rep3             | 351                       | 32 159 970             | 68 273 091  | 47.10                      |
| <b>Data sets</b>    |                           | <b>Comparison</b>      |             | <b>Number of peaks</b>     |
| TriplexRNA (SPRI)   |                           | SPRI vs. Nuclear       |             | 3282                       |
| TriplexRNA (DNA-IP) |                           | DNA-IP vs. Nuclear     |             | 7189                       |
| Chrom-assoc.RNA     |                           | Chrom-assoc. vs DNA-IP |             | 37 935                     |
| Nuclear RNA         |                           | Nuclear vs. DNA-IP     |             | 25 281                     |



**Supplementary Table S5.**

Read/ peak numbers in TriplexDNA-seq

| <b>Samples</b>   | <b>Library average size (bp)</b> | <b>Uniquely mapped reads</b> | <b>Total reads</b> | <b>% of uniquely mapped reads</b> |
|------------------|----------------------------------|------------------------------|--------------------|-----------------------------------|
| -RL_rep1         | 350                              | 28 250 630                   | 33 672 339         | 83.90                             |
| +RL_rep1         | 348                              | 28 131 092                   | 34 159 767         | 82.35                             |
| -RL_rep2         | 364                              | 25 134 249                   | 30 632 181         | 82.05                             |
| +RL_rep2         | 364                              | 23 459 098                   | 27 595 132         | 85.01                             |
| -RL_rep3         | 357                              | 26 968 596                   | 31 906 908         | 84.52                             |
| +RL_rep3         | 376                              | 23 547 362                   | 27 698 628         | 85.01                             |
| -RL_rep4         | 380                              | 28 751 651                   | 34 463 848         | 83.43                             |
| +RL_rep4         | 364                              | 23 515 829                   | 27 735 597         | 84.79                             |
| <b>Data sets</b> | <b>Comparison</b>                |                              |                    | <b>Number of peaks</b>            |
| TriplexDNA       | +RNA ligase vs. -RNA ligase      |                              |                    | 2547                              |
| Control DNA      | -RNA ligase vs. +RNA ligase      |                              |                    | 3014                              |

**Supplementary Table S6.**

Read/ peak numbers in NEAT1-TFR-capture-seq

| <b>Samples</b>   | <b>Library average size (bp)</b> | <b>Uniquely mapped reads</b> | <b>Total reads</b> | <b>% of uniquely mapped reads</b> |
|------------------|----------------------------------|------------------------------|--------------------|-----------------------------------|
| Control_rep1     | 311                              | 49 707 873                   | 53 256 870         | 93.34                             |
| Control_rep2     | 331                              | 35 594 218                   | 38 239 800         | 93.08                             |
| Control_rep3     | 330                              | 38 038 763                   | 40 927 647         | 92.94                             |
| TFR1_rep1        | 330                              | 46 966 681                   | 51 630 284         | 90.97                             |
| TFR1_rep2        | 308                              | 40 827 126                   | 44 675 435         | 91.39                             |
| TFR1_rep3        | 329                              | 45 171 398                   | 49 180 705         | 91.85                             |
| TFR2_rep1        | 301                              | 48 770 794                   | 53 942 991         | 90.41                             |
| TFR2_rep2        | 346                              | 38 557 848                   | 42 932 097         | 89.81                             |
| TFR2_rep3        | 320                              | 94 597 187                   | 104 703 363        | 90.35                             |
| <b>Data sets</b> | <b>Comparison</b>                |                              |                    | <b>Number of peaks</b>            |
| TFR1-assoc.DNA   | TFR1 vs. Control oligo           |                              |                    | 622                               |
| TFR1 control DNA | Control vs. TFR1 oligo           |                              |                    | 4001                              |
| TFR2-assoc.DNA   | TFR2 vs. Control oligo           |                              |                    | 4423                              |
| TFR2 control DNA | Control vs. TFR2 oligo           |                              |                    | 1594                              |

**Supplementary Table S7.**

Read/ peak numbers in ASO-mediated-capture-seq

| <b>Samples</b>             | <b>Library average size (bp)</b> | <b>Uniquely mapped reads</b> | <b>Total reads</b>     | <b>% of uniquely mapped reads</b> |
|----------------------------|----------------------------------|------------------------------|------------------------|-----------------------------------|
| Sense_rep1                 | 364                              | 31 547 105                   | 36 865 879             | 85.57                             |
| Antisense_rep1             | 367                              | 26 631 756                   | 31 011 185             | 85.88                             |
| Sense_rep2                 | 372                              | 33 532 439                   | 38 621 482             | 86.82                             |
| Antisense_rep2             | 373                              | 37 575 051                   | 43 419 553             | 86.54                             |
| Sense_rep3                 | 289                              | 44 050 048                   | 50 702 789             | 86.88                             |
| Antisense_rep3             | 308                              | 36 859 683                   | 43 023 472             | 85.67                             |
| Sense_MCF7                 | 285                              | 40 345 941                   | 46 534 218             | 86.70                             |
| Antisense_MCF7             | 335                              | 40 516 315                   | 47 114 634             | 86.00                             |
| <b>Data sets</b>           | <b>Comparison</b>                |                              | <b>Number of peaks</b> |                                   |
| NEAT1-assoc.DNA<br>HeLa S3 | Antisense vs. Sense oligo        |                              | 3692                   |                                   |
| Control DNA<br>HeLa S3     | Sense vs. Antisense oligo        |                              | 2066                   |                                   |
| NEAT1-assoc.DNA<br>MCF7    | Antisense vs. Sense oligo        |                              | 3780                   |                                   |
| Control DNA<br>MCF7        | Sense vs. Antisense oligo        |                              | 2240                   |                                   |
